# Supplementary material
Source: Springer Nature journal article supplement (https://www.springermedizin.de/resource/supplementary/12913_2013_3381_MOESM3_ESM.pdf/9532636)
Supplement: MOESM3 [file 9532636]

**Supplementary material 3:** The incremental cost-effectiveness ratio in euros per event-free year for each strategy with different discounting rates. Costs were inflated to the year 2010. \*Both costs and effects were discounted at the same rate

| Strategies                          | ICER (€/year)      |                      |                    |                     |
|-------------------------------------|--------------------|----------------------|--------------------|---------------------|
|                                     | Base case          | Sensitivity analysis |                    |                     |
|                                     | 5%<br>Discounting* | 0%<br>Discounting*   | 3%<br>Discounting* | 10%<br>Discounting* |
| KardioPro for all risk groups       | 77,742             | 77,654               | 77,749             | 77,727              |
| KardioPro for the CHD group         | 26,456             | 26,411               | 26,448             | 26,470              |
| KardioPro for the high-risk group   | 20,901             | 21,174               | 21,017             | 20,626              |
| KardioPro for the medium-risk group | 52,323             | 52,315               | 52,351             | 52,256              |
| KardioPro for the low-risk group    | 186,074            | 185,007              | 185,749            | 186,846             |

CHD: coronary heart diseases

ICER: incremental cost-effectiveness ratio
